# Supplementary material for: Development of an HRMA-Based Marker Assisted Selection (MAS) Approach for Cost-Effective Genotyping of S and M Loci Controlling Self-Compatibility in Apricot (Prunus armeniaca L.)
Source: MDPI journal article supplement (doi:10.3390/genes13030548), 2022-03-20
Supplement: s1 [file s1]

# SFB sequences alignment

|            |            |             |             |            |            |                       |
|------------|------------|-------------|-------------|------------|------------|-----------------------|
|            | 421        |             |             |            |            | 480                   |
| AY587563.1 | GATTTT     | CCTTG       | CCTATTACCA  | ATCTCAAAAG | TGAGTCATTG | TCATTGGACT TTCTGCAAAA |
| AY587562.1 | CTTCCC     | CATTG       | CCGATTACGA  | ACCTCAAAAG | TGAGTCATTG | -----GACT TTCTGCGAAA  |
| AY587565.1 | CTTTTC     | CATTG       | CCCAT-ACCA  | ACCTCAGAAG | TAAGTCATTG | -----G--- TTCTGCAAAA  |
| DQ422946.1 | CCCTT      | CCTTG       | CCTATTCCCA  | ACCTCAAAAG | TGAGTCGTTG | -----GACT TTCTGCAAAA  |
| DQ887488.1 |            | TTG         | GCTATTTRTCA | ACCGCAAAAG | TGAGTCGTTG | -----GACT TTCTGCAAAA  |
| EF101912.1 |            |             |             |            |            |                       |
| DQ897929.1 |            | TTA         | GCTATTSTMA  | -CCTCAAAAG | TGAGTCGTTG | -----GACT TTCTGCAAAA  |
| FJ477418.1 |            | TTG         | CCTATTATCA  | ACCGCAAAAG | TGAGTACT-- | -----GCACT TTGTGCAAAA |
| EF053406.1 |            |             |             |            |            |                       |
|            | 481        |             |             |            |            | 540                   |
| AY587563.1 | ATGGAAGCAC | CAATTTTATTT | CCTAACTTGA  | TTGTATTACA | ATCCATATTC | TAAATTCGAA            |
| AY587562.1 | AAGAAAGCAC | AATTGT-TTT  | ---AACTTTG  | TTCCGTTATG | ATCCATACTT | TAGATTCTAA            |
| AY587565.1 | CTAAAGCAC  | CATTGT-CTT  | CCTAACTTTG  | TTTGTCAACG | ATCCATACTT | TAGATTCTAA            |
| DQ422946.1 | ATGAAAAGCA | CTATTGTTTT  | CC-----TTG  | TTTTGTTATG | ATCAATATTT | TGGATGCTAA            |
| DQ887488.1 | ATGAAAAGCA | CTATTGTTTT  | CC-----TTG  | TTTTGTTATG | ATCAATATTT | TGGATGCTAA            |
| EF101912.1 |            |             |             |            |            |                       |
| DQ897929.1 | ATGAAAAGCA | CTATTGTTTT  | CC-----TTG  | TTTTGTTATG | ATCAATATTT | TGGATGCTAA            |
| FJ477418.1 | ATGAAAGAGC | --ATTGCTTT  | CCTAACTTTG  | TTTTGTTATG | ATCCGTACTT | TAGATTCTAA            |
| EF053406.1 |            |             |             |            |            |                       |
|            | 541        |             |             |            |            | 600                   |
| AY587563.1 | CTTATCTTAT | TA-----TG   | ATTCAGGATG  | GCATTACAC  | TACGCAAGAA | AGAAATCTTA            |
| AY587562.1 | CTTATTTTCA | TTATGATTTT  | CTTCAGGATG  | ACATTACGC  | TGCATAAGAA | AGAAATCTTA            |
| AY587565.1 | CATATTTTCG | TTATGAGTTT  | CTTCAGCATG  | ACATTCACTC | TATGTAAGAA | AGAAATTTTA            |
| DQ422946.1 | CTTATTTTGA | TTATGA-TTT  | CTTCAGGATG  | ACATTACAC  | TACGTAAGAA | AGAAATCTTA            |
| DQ887488.1 | CTTATTTTGA | TTATGA-TTT  | CTTCAGGATG  | ACATTACAC  | TACGTAAGAA | AGAAATCTTA            |
| EF101912.1 |            |             |             |            | TAAGAA     | AGAAATCTTA            |
| DQ897929.1 | CTTATTTTGA | TTATGA-TTT  | CTTCAGGATG  | ACATTACAC  | TACGTAAGAA | AGAAATCTTA            |
| FJ477418.1 | CATATTTTCA | TTATGATTTT  | CTTCAGGATG  | GCATTACAC  | TACGTAAGAA | AGAAATCTTA            |
| EF053406.1 |            |             |             |            |            |                       |
|            | 601        | SFBc-F      |             |            |            | 660                   |
| AY587563.1 | GTCGACATCC | TAGTAAGACT  | ACCTGCAAAA  | TCTCTCGTTC | GGTTTCTGTG | TACATGCAAG            |
| AY587562.1 | ATCGACATCC | TAGTAAGACT  | ACCCGCAAAA  | TCCCTCGTTC | GGTTTCTGTG | TACATGCAAG            |
| AY587565.1 | GTCGACATCC | TGGTAAGACT  | GCCTGCAAAA  | TCTCTCGTTC | GGTTTATGTG | TACATGTAAG            |
| DQ422946.1 | ATCGACATCC | TAGTAAGACT  | ACCTGCAAAA  | TCCCTTATTC | GCTTTCTGAG | TACATGCAAG            |
| DQ887488.1 | ATCGACATCC | TAGTAAGACT  | ACCTGCAAAA  | TCCCTTATTC | GCTTTCTGAG | TACATGCAAG            |
| EF101912.1 | ATCGACATCC | TAGTAAGACT  | ACCTGCAAAA  | TCCCTTATTC | GCTTTCTGAG | TACATGCAAG            |
| DQ897929.1 | ATCGACATCC | TAGTAAGACT  | ACCTGCAAAA  | TCCCTTATTC | GCTTTCTGAG | TACATGCAAG            |
| FJ477418.1 | ATCGACATCC | TACTAAGACT  | ACCTGCAAAA  | TCCCTCATT  | GGTTTCTAAG | TACATGCAAG            |
| EF053406.1 |            |             |             | T          | TCTCTTGTT  | GGTTTCTGTG TACATGCAAG |
|            | 661        |             |             |            |            | 720                   |
| AY587563.1 | TCATGGAGTG | GTTTGATTGG  | CAGCTCGAGT  | TTTGTTAGCA | TACACCTTAA | CAGGAATGTC            |
| AY587562.1 | TTATGGGGTG | ATTTGATTGG  | CAGCTCAAGT  | TTTGTTAGTG | CACACCTTAA | TAGGAATGTC            |
| AY587565.1 | TCATGGAGTG | ATTTGATTGG  | CAGCTCCAGT  | TTTGTTAGCA | CACACCTTAA | TAGGAATGTC            |
| DQ422946.1 | TCGTGGAGTG | ATTTGATTGG  | AAGCTCAATT  | TTTGTTAGCA | CACACCTTTG | TAGGAATGTG            |
| DQ887488.1 | TCGTGGAGTG | ATTTGATTGG  | AAGCTCAATT  | TTTGTTAGCA | CACACCTTTG | TAGGAATGTG            |
| EF101912.1 | TCGTGGAGTG | ATTTGATTGG  | AAGCTCAATT  | TTTGTTAGCA | CACACCTTTG | TAGGAATGTG            |
| DQ897929.1 | TCGTGGAGTG | ATTTGATTGG  | AAGCTCAATT  | TTTGTTAGCA | CACACCTTTG | TAGGAATGTG            |
| FJ477418.1 | TCATGGAGTG | ATTTGATTGG  | CAGCTCGAGT  | TTTGTTAGCA | CACATCTTAA | TAAGAATGTC            |
| EF053406.1 | TCGTGGAGTG | ATTTGATTGG  | AAGCTCAATT  | TTTGTTAGCA | CACACCTTTG | TAGGAATGTG            |
|            | 721        |             |             |            |            | 780                   |
| AY587563.1 | ACAGAACATG | CCCATGTCTA  | TCTACTCTGC  | CTCCTCCACC | CAAATTTTGA | ACGTCTGGCC            |
| AY587562.1 | ACAAAACGTG | CCCCTGTATA  | TCTTCTTTGC  | CTCCACCACC | CAAATTTTGA | ACGTGAGAAC            |
| AY587565.1 | AATAAACATG | CCCATGTATA  | TCTACTTTGC  | CTCCACCATC | CAAATTTTGA | ATGTGTGGTG            |
| DQ422946.1 | ACAAAACATA | CCCATGTTTA  | TCTACTTTGC  | CTCCACCACC | CAAATTTTGA | GCGTTTGGTC            |
| DQ887488.1 | ACAAAACATA | CCCATGTTTA  | TCTACTTTGC  | CTCCACCACC | CAAATTTTGA | GCGTTTGGTC            |

|            |            |               |            |            |            |            |
|------------|------------|---------------|------------|------------|------------|------------|
| EF101912.1 | ACAAAACATA | CCCATGTTTA    | TCTACTTTGC | CTCCACCACC | CAAATTTTGA | GCGTTTGGTC |
| DQ897929.1 | ACAAAACATA | CCCATGTTTA    | TCTACTTTGC | CTCCACCACC | CAAATTTTGA | GCGTTTGGTC |
| FJ477418.1 | ACAAAACATG | CCCATGTCTA    | TCTACTTTGC | CTCCACCACC | CAAATTTTGA | ATGTGTGATC |
| EF053406.1 | ACAAAACATA | CCCATGTTTA    | TCTACTTTGC | CTCCACCACC | CAAATTTTGA | GCGTTTGGTC |
|            | 781        |               |            |            |            | 840        |
| AY587563.1 | GACCCTGATG | ACCCATATGT    | TAAACAAGAG | TTTAGCTGGT | CTCTTTTTTC | GAATGAAACA |
| AY587562.1 | GACACTGATG | ACCCATATGA    | CATAGAAGAA | CTTCAGTGGT | CACTTTTTTC | CAAAGAAACA |
| AY587565.1 | GACCCTGATG | ACCCATATTT    | AGAAGAAGAA | GTTCAATGGT | CTCTTTTTTC | CAATGAAACA |
| DQ422946.1 | GACCCTAATG | ACCCATATCT    | TAAAAAGGAA | TTTCAATGGT | CTCTTTTTTC | CAAAGAAACA |
| DQ887488.1 | GACCCTAATG | ACCCATATCT    | TAAAAAGGAA | TTTCAATGGT | CTCTTTTTTC | CAAAGAAACA |
| EF101912.1 | GACCCTAATG | ACCCATATCT    | TAAAAAGGAA | TTTCAATGGT | CTCTTTTTTC | CAAAGAAACA |
| DQ897929.1 | GACCCTAATG | ACCCATATCT    | TAAAAAGGAA | TTTCAATGGT | CTCTTTTTTC | CAAAGAAACA |
| FJ477418.1 | GACCCCGATG | ACCCATATTT    | AGAAGAAGAA | CTTCAATGGT | CTCTTTTTTC | CAATGTAACA |
| EF053406.1 | GACCCTAATG | ACCCATATCT    | TAAAAAGGAA | TTTCAATGGT | CTCTTTTTTC | CAAAGAAACA |
|            | 841        | <b>RFBc-F</b> |            |            |            | 900        |
| AY587563.1 | TTTGAGGAAA | GCTCCAAGAT    | AACCCATCCC | TTAGGGAGCA | CAGAACATTA | TGGGATATAT |
| AY587562.1 | TTTGAGCAGT | TCTCCAAGTT    | AACCCATCCC | TTAGGAAGCA | CAGAATATTA | TGGGGTATAT |
| AY587565.1 | TTTGAGGAAT | GCTCCAAGTT    | AAACCATCCC | TTAGGGAGCA | CAGAACATTA | TGGGATATAT |
| DQ422946.1 | TTTGAGGAGT | GCTACAAACT    | AAGCCATCCC | TTAGGGATGA | CAGAACATTA | TGGGATATAT |
| DQ887488.1 | TTTGAGGAGT | GCTACAAACT    | AAGCCATCCC | TTAGGGATGA | CAGAACATTA | TGGGATATAT |
| EF101912.1 | TTTGAGGAGT | GCTACAAACT    | AAGCCATCCC | TTAGGGATGA | CTGAACATTA | TGGGATATAT |
| DQ897929.1 | TTTGAGGAGT | GCTACAAACT    | AAGCCATCCC | TTAGGGATGA | CAGAACATTA | TGGGATATAT |
| FJ477418.1 | TTTGAGAAGT | GCTCCAAGTT    | AAGCCATCCC | CTAGGAAGCA | CAAAACATTA | TGGGATATAT |
| EF053406.1 | TTTGAGGAGT | GCTACAAACT    | AAGCCATCCC | TTAGGGATGA | CAGAACATTA | TGGGATATAT |
|            | 901        |               |            |            |            | 960        |
| AY587563.1 | GGTTCAAGCA | ATGGTTTAGT    | TTGCATTTCA | GATGAGATT  | TGAATTTTCA | TAGTCCTATA |
| AY587562.1 | GGTTCAAGCA | ATGGTTTAGT    | TTGCATTTCA | GATGAGATCT | TGAATTTTCA | TAGTCCTATA |
| AY587565.1 | GGCTCCAGCA | ATGGTTTAGT    | TTGCATTTCA | GATGAGATAT | TGAATTTTCA | TAGTCCTATA |
| DQ422946.1 | GGTTCAAGCA | ATGGTTTAGT    | TTGCATTTCA | GATGAGATCC | TGAATTTTCA | TAGTCCTATA |
| DQ887488.1 | GGTTCAAGCA | ATGGTTTAGT    | TTGCATTTCA | GATGAGATCC | TGAATTTTCA | TAGTCCTATA |
| EF101912.1 | GGTTCAAGCA | ATGGTTTAGT    | TTGCATTTCA | GATGAGATCC | TGAATTTTCA | TAGTCCTATA |
| DQ897929.1 | GGTTCAAGCA | ATGGTTTAGT    | TTGCATTTCA | GATGAGATCC | TGAATTTTCA | TAGTCCTATA |
| FJ477418.1 | GGTTCAAGCA | ATGGTTTGCT    | TTGCATTTCT | GATGAGATAT | TGAATTTTCA | TAGTCCAATA |
| EF053406.1 | GGTTCAAGCA | ATGGTTTAGT    | TTGCATTTCA | GATGAGATCC | TGAATTTTCA | TAGTCCTATA |
|            | 961        |               |            |            |            | 1020       |
| AY587563.1 | CACATATGGA | ACCCGTCGGT    | TAAGAAATTT | AAGACCCCTC | CAATGAGCAC | CAACATTAAC |
| AY587562.1 | CACATATGGA | ACCCATCAGT    | TAGGAAATTT | AGGACCCCTC | AAATGAGCAC | CAACATTAAC |
| AY587565.1 | CATATATGGA | ACCCATCAGT    | TAGGAACTTT | CGGACCCCTC | CAATAAGCAC | CAACATCA-- |
| DQ422946.1 | CACATATGGA | ACCCATCAGT    | TAGGAAATTT | AGGGCCCTTC | CAATGAGCAC | CAACATTAAC |
| DQ887488.1 | CACATATGGA | ACCCATCAGT    | TAGGAAATTT | AGGGCCCTTC | CAATGAGCAC | CAACATTAAC |
| EF101912.1 | CACATATGGA | ACCCATCAGT    | TAGGAAATTT | AGGGCCCTTC | CAATGAGCAC | CAACATTAAC |
| DQ897929.1 | CACATATGGA | ACCCATCAGT    | TAGGAAATTT | AGGGCCCTTC | CAATGAGCAC | CAACATTAAC |
| FJ477418.1 | CACATATGGA | ACCCATTGGT    | TGGAAGATAT | AGGACCCCTC | CAATGAGCAC | CAACATTAAC |
| EF053406.1 | CACATATGGA | ACCCATCAGT    | TAGGAAATTT | AGGGCCCTTC | CAATGAGCAC | CAACATTAAC |
|            | 1021       |               |            |            |            | 1080       |
| AY587563.1 | ATTAAATTTA | GCCTCGTTTC    | TCTCCAATTC | GGGTTCCATC | CTAGGGTTAA | TGACTACAAG |
| AY587562.1 | GTTAAATTTA | GCTATGTTGC    | TCTCCAATTC | GGGTTCCACC | CCCTCGTTAA | TGACTACAAG |
| AY587565.1 | -TTAAATTTA | GCCATGTTGC    | TCTCCAGTTC | GGGTTCCATC | CCGGGGTTAA | TGACTATAAG |
| DQ422946.1 | ATTAAATTTA | GCTGTGTTGC    | TCTCCAGTTC | GGGTTCCACC | CTGGGGTTAA | TGACTACAAG |
| DQ887488.1 | ATTAAATTTA | GCTGTGTTGC    | TCTCCAGTTC | GGGTTCCACC | CTGGGGTTAA | TGACTACAAG |
| EF101912.1 | ATTAAATTTA | GCTGTGTTGC    | TCTCCAGTTC | GGGTTCCACC | CTGGGGTTAA | TGACTACAAG |
| DQ897929.1 | ATTAAATTTA | GCTGTGTTGC    | TCTCCAGTTC | GGGTTCCACC | CTGGGGTTAA | TGACTACAAG |
| FJ477418.1 | ATTAAATTTA | ATTATGTTGC    | TCTCCAATTC | GGGTTTCACC | CTGGGGTTAA | TGACTACAAG |
| EF053406.1 | ATTAAATTTA | GCTGTGTTGC    | TCTCCAGTTC | GGGTTCCACC | CTGGGGTTAA | TGACTACAAG |
|            | 1081       |               |            |            |            | 1140       |
| AY587563.1 | GCTGTAAGGA | TGATGCGCAC    | CAACAAAAT  | GTCTTGCGCG | TTGAGGTTTA | TAGTCTCAGC |
| AY587562.1 | GCTGTAAGGA | TGATGCGTAC    | CAACAAAAT  | TCTTTGCGAG | TTGAGGTTTA | TAGTCTTAGA |

|            |            |            |               |            |               |            |
|------------|------------|------------|---------------|------------|---------------|------------|
| AY587565.1 | GCTGTAAGGA | TGATGCGTAC | CAACAAAAAT    | GCCTTGGCGA | TTGAGGTGTA    | TAGTCTTAGA |
| DQ422946.1 | GCTGTAAGGA | TGATGCGTAC | CAATAAAAGT    | GCCTTGGCGG | TTGAGGTTTA    | TAGTCTCAAA |
| DQ887488.1 | GCTGTAAGGA | TGATGCGTAC | CAATAAAAGT    | GCCTTGGCGG | TTGAGGTTTA    | TAGTCTCAAA |
| EF101912.1 | GCTGTAAGGA | TGATGCGTAC | CAATAAAAGT    | GCCTTGGCGG | TTGAGGTTTA    | TAGTCTCAAA |
| DQ897929.1 | GCTGTAAGGA | TGATGCGTAC | CAATAAAAGT    | GCCTTGGCGG | TTGAGGTTTA    | TAGTCTCAAA |
| FJ477418.1 | GCTGTAAGGA | TGATGCGTAC | CAACAAAGAT    | GCCTTGGCGG | TTGAGGTTTA    | TAGTCTTAGA |
| EF053406.1 | GCTGTAAGGA | TGATGCGTAC | CAATAAAAGT    | GCCTTGGCGG | TTGAGGTTTA    | TAGTCTCAAA |
|            | 1141       |            |               |            | <b>RFBc-R</b> | 1200       |
| AY587563.1 | ACAGACTCTT | GGAAAATGGT | TGAAGCAATT    | CCTCCTTGGT | TAAAATGCAC    | TTGGCAGCAT |
| AY587562.1 | ACAAACTCTT | GGAAGATGAT | TGAAGCAATT    | CCTCCTTGGT | TGAAATGCAC    | TTGGCAGCAT |
| AY587565.1 | ACAGACTCTT | GGAAGATGAT | TGAAGCAATT    | CCTCCTTGGT | TAAAGTGCAC    | TTGGCAGCAT |
| DQ422946.1 | AGAGACTCTT | GGAAGATGAT | TGAAGCAATT    | CCTCCTTGGT | TAAAATGCAC    | TTTGGAACAT |
| DQ887488.1 | AGAGACTCTT | GGAAGATGAT | TGAAGCAATT    | CCTCCTTGGT | TAAAATGCAC    | TTTGGAACAT |
| EF101912.1 | AGAGACTCTT | GGAAGATGAT | TGAAGCAATT    | CCTCCTTGGT | TAAAATGCAC    | TTTGGAACAT |
| DQ897929.1 | AGAGACTCTT | GGAAGATGAT | TGAAGCAATT    | CCTCCTTGGT | TAAAATGCAC    | TTTGGAACAT |
| FJ477418.1 | ACAGACTCGT | GGAAGATGAT | TGAAGCAATT    | CCTCCTTGGT | TAAAATGCAC    | TTGGCAGCAT |
| EF053406.1 | AGAGACTCTT | GGAAGATGAT | TGAAGCAATT    | CCTCCTTGGT | TAAAATGCAC    | TTTGGAACAT |
|            | 1201       |            | <b>SFBj-F</b> |            |               | 1260       |
| AY587563.1 | CATAAGGGTA | CATTTTTTAA | TGGAGTAGCA    | TACCACATCA | TTGAGAAAGG    | TCCTCTATTC |
| AY587562.1 | TATAAGGGTA | CCTTTTTTAA | TGGAGTAGCA    | TACCACATCA | TCGAGAAAGG    | TCCTATATTC |
| AY587565.1 | TATAAGGGTA | CATTTTTTAA | TGGAGTAGCA    | TACCACATCA | TTGAGAAAGG    | TCCTATATTC |
| DQ422946.1 | CATAGGGGTA | CGTTTTTCAG | TGGAGTAGCA    | TACCACATCA | TTGAGAAAGG    | TCCTATGCTC |
| DQ887488.1 | CATAGGGGTA | CGTTTTTCAG | TGGAGTAGCA    | TACCACATCA | TTGAGAAAGG    | TCCTATGCTC |
| EF101912.1 | CATAGGGGTA | CGTTTTTCAG | TGGAGTAGCA    | TACCACATCA | TTGAGAAAGG    | TCCTATGCTC |
| DQ897929.1 | CATAGGGGTA | CGTTTTTCAG | TGGAGTAGCA    | TACCACATCA | TTGAGAAAGG    | TCCTATGCTC |
| FJ477418.1 | CATATGGGTA | CATTTTTTAA | TGGAGTAGCA    | TACCACATCA | TTGAGAAAGG    | TCCCATATTC |
| EF053406.1 | CATAGGGGTA | CGTTTTTCAG | TGGAGTAGCA    | TACCACATCA | TTGAGAAAGG    | TCCTATGCTC |
|            | 1261       |            | <b>SFBc-R</b> |            |               | 1320       |
| AY587563.1 | AGCATTATGT | CCTTCGATTC | AGGCAGTGAA    | GAATTCGAAG | AATTCATAGC    | ACCAGATGCC |
| AY587562.1 | AGCATTATGT | CCTTCGATTC | AGGCAGTGAA    | GAATTCGAAG | AATTCATAGC    | ACCAGATGCC |
| AY587565.1 | AGCATCATGT | CCTTCGATTC | AGGCAGTGAA    | GAATTCGAGG | AATTCATAGC    | ACCAGATGCC |
| DQ422946.1 | AGCATTATGT | CATTCGATTC | AGGCAGTGAA    | AAATTCGAAG | AAATCATAGC    | ACCAGATGCC |
| DQ887488.1 | AGCATTATGT | CATTCGATTC | AGGCAGTGAA    | AAATTCGAAG | AAATCATAGC    | ACCAGATGCC |
| EF101912.1 | AGCATTATGT | CATTCGATTC | AGGCAGTGAA    | AAATTCGAAG | AAATCATAGC    | ACCAGATGCC |
| DQ897929.1 | AGCATTATGT | CATTCGATTC | AGGCAGTGAA    | AAATTCGAAG | AAATCATAGC    | ACCAGATGCC |
| FJ477418.1 | AGCATTATGT | CCTTCGATTC | AAGCAGTGAA    | GAATTCGAAG | AGTTCATAGC    | ACCAGATGCC |
| EF053406.1 | AGCATTATGT | CATTCGATTC | AGGCAGTGAA    | AAATTCGAAG | AAATCATAGC    | ACCAGATGCC |
|            | 1321       |            |               |            |               | 1380       |
| AY587563.1 | ATTTGCCGTT | CATTGGGGTT | ATGCATCGAC    | GTTTACAAGG | AACACATTTG    | CTTGCTTTTT |
| AY587562.1 | ATTTGCAGTT | CATGGGGGTT | ATGTATTGAC    | GTTTACAAGG | AAAATATTTG    | CTTGCTTCTT |
| AY587565.1 | ATTTGCCGTT | CATCTGAGGT | ATGTATTGAC    | GTTTACAAGG | AACAAATTTG    | CTTGCTTTTT |
| DQ422946.1 | ATTTGCAGTT | TATGGGGGTT | ATATATTGAC    | GTTTACAAGG | AACAAATTTG    | CTTGCTTTTT |
| DQ887488.1 | ATTTGCAGTT | TATGGGGGTT | ATATATTGAC    | GTTTACAAGG | AACAAATTTG    | CTTGCTTTTT |
| EF101912.1 | ATTTGCAGTT | TATGGGGGTT | ATATATTGAC    | GTTTACAAGG | AACAAATTTG    | CTTGCTTTTT |
| DQ897929.1 | ATTTGCAGTT | TATGGGGGTT | ATATATTGAC    | GTTTACAAGG | AACAAATTTG    | CTTGCTTTTT |
| FJ477418.1 | ATTTGCAGTT | CATGGAGGTT | ATGCATCAGC    | GTTTACAAGG | AACAACCTTG    | CTTGCTTTTT |
| EF053406.1 | ATTTGCAGTT | TATGGGGGTT | ATATATTGAC    | GTTTACAAGG | AACAAATTTG    | CTTGCTTTTT |
|            | 1381       |            |               |            | <b>SFB-F</b>  | 1440       |
| AY587563.1 | GGATTTTATG | GTTGTGAGGA | GGAGGGCATG    | GACAAAATTG | ACTTATGGGT    | TCTGCAAGAG |
| AY587562.1 | CAGTTTTATT | CTAGTGAGGA | GGAGGGGATG    | CGAAAAGCTG | ACTTATGGGT    | TCTGCAAGAA |
| AY587565.1 | GGATTTTATC | GTTGTGAGGA | GATGGGCATG    | GATAAAATTG | ACTTGTGGGT    | TCTGCAAGAA |
| DQ422946.1 | ATATGTTATG | GGTGTGAGGA | GGAGGGCATG    | GAAAAAGCTG | ACTTATGGGT    | TCTGCAAGAA |
| DQ887488.1 | ATATGTTATG | GGTGTGAGGA | GGAGGGCATG    | GAAAAAGCTG | ACTTATGGGT    | TCTGCAAGAA |
| EF101912.1 | ATATGTTATG | GGTGTGAGGA | GGAGGGCATG    | GAAAAAGCTG | ACTTATGGGT    | TCTGCAAGAA |
| DQ897929.1 | ATATGTTATG | GGTGTGAGGA | GGAGGGCATG    | GAAAAAGCTG | ACTTATGGGT    | TCTGCAAGAA |
| FJ477418.1 | GGATTTTATG | GTTGTGAGGA | GGAGGACATG    | GAAAAACTTC | TCTTATGGGT    | TCTGCAAGAA |
| EF053406.1 | ATATGTTATG | GGTGTGAGGA | GGAGGGCATG    | GAAAAAGCTG | ACTTATGGGT    | TCTGCAAGAA |

|            |            |                  |             |                  |            |            |      |      |
|------------|------------|------------------|-------------|------------------|------------|------------|------|------|
|            | 1441       | <b>SFBcj-F</b>   |             |                  |            |            |      | 1500 |
| AY587563.1 | AAACGGTGGA | AAAAATTGTG       | TCCTTTTATT  | TA-----          | -----      | -----      |      |      |
| AY587562.1 | AAACGGTGGA | AGCAATTGTG       | TCCTTTTATT  | TA-----          | -----      | -----      |      |      |
| AY587565.1 | AAACGGTGGA | AACAGTTGTG       | TCCTTTTATT  | TA-----          | -----      | -----      |      |      |
| DQ422946.1 | AAACGGTGGA | AACAATTGAG       | TCCTTTTATT  | TAGAGATATT       | TAGTGATATA | CCCATTCTTA |      |      |
| DQ887488.1 | AAACGGTGGA | AACAATTGAG       | TCCTTTTATT  | TAGAGATATT       | TAGTGATATA | CCCATTCTTA |      |      |
| EF101912.1 | AAACGGTGGA | AACAATTGAG       | TCCTTTTATT  | TAGAGATATT       | TAGTGATATA | CCCATTCTTA |      |      |
| DQ897929.1 | AAACGGTGGA | AACAATTGAG       | TCCTTTTATT  | TA-----          | -----      | -----      |      |      |
| FJ477418.1 | AAACGGTGGA | AACAATTGTG       | TCCTGTTATT  | TA-----          | -----      | -----      |      |      |
| EF053406.1 | AAACGGTGGA | AACAATTGAG       | TCCTTTTATT  | TA-----          | -----      | -----      |      |      |
|            | 1501       |                  |             |                  |            |            |      | 1560 |
| AY587563.1 | -----      | -----            | -----       | -----            | -----      | -----      |      |      |
| AY587562.1 | -----      | -----            | -----       | -----            | -----      | -----      |      |      |
| AY587565.1 | -----      | -----            | -----       | -----            | -----      | -----      |      |      |
| DQ422946.1 | ACACTAATAT | TATAGATAAA       | CCCTCCATCA  | TTGAATTTCT       | ATAAACAAAC | CCAAAAAAAA |      |      |
| DQ887488.1 | ACACTAATAT | TATAGATAAA       | CCCTCCATCA  | TTGAATTTCT       | ATAAACAAAC | CCAAAAAAAA |      |      |
| EF101912.1 | ACACTAATAT | TATAGATAAA       | CCCTCCATCA  | TTGAATTTCT       | ATAAACAAAC | CCAAAAAAAA |      |      |
| DQ897929.1 | -----      | -----            | -----       | -----            | -----      | -----      |      |      |
| FJ477418.1 | -----      | -----            | -----       | -----            | -----      | -----      |      |      |
| EF053406.1 | -----      | -----            | -----       | -----            | -----      | -----      |      |      |
|            | 1561       |                  |             |                  |            |            |      | 1620 |
| AY587563.1 | -----      | -----            | -----       | -----            | -----      | -----      |      |      |
| AY587562.1 | -----      | -----            | -----       | -----            | -----      | -----      |      |      |
| AY587565.1 | -----      | -----            | -----       | -----            | -----      | -----      |      |      |
| DQ422946.1 | CCCAAAAAAT | GACAACTGGC       | CTTATTGAAT  | TTAATATTGA       | TTATTAAATT | ACTTTAATGC |      |      |
| DQ887488.1 | CCCAAAAAAT | GACAACTGGC       | CTTATTGAAT  | TTAATATTGA       | TTATTAAATT | ACTTTAATGC |      |      |
| EF101912.1 | CCCAAAAAAT | GACAACTGGC       | CTTATTGAAT  | CTAATATTGA       | TTATTAAATT | ACTTTAATGC |      |      |
| DQ897929.1 | -----      | -----            | -----       | -----            | -----      | -----      |      |      |
| FJ477418.1 | -----      | -----            | -----       | -----            | -----      | -----      |      |      |
| EF053406.1 | -----      | -----            | -----       | -----            | -----      | -----      |      |      |
|            | 1621       | <b>SFB-INS-F</b> |             | <b>SFB-INS-R</b> |            |            | 1680 |      |
| AY587563.1 | -----      | -----            | -----       | -----            | -----      | -----      |      |      |
| AY587562.1 | -----      | -----            | -----       | -----            | -----      | -----      |      |      |
| AY587565.1 | -----      | -----            | -----       | -----            | -----      | -----      |      |      |
| DQ422946.1 | CCTATTGAGT | GTTTTGGGTA       | TTTTTATGAG  | ATTTTGGGGT       | TGGGCTTGTT | TTAAGAAATT |      |      |
| DQ887488.1 | CCTATTGAGT | GTTTTGGGTA       | TTTTTATGAG  | ATTTTGGGGT       | TGGGCTTGTT | TTAAGAAATT |      |      |
| EF101912.1 | CCTATTGAGT | GTTTTGGGTA       | TTTTTATGAG  | ATTTTGGGGT       | TGGGCTTGTT | TTAAGAAATT |      |      |
| DQ897929.1 | -----      | -----            | -----       | -----            | -----      | -----      |      |      |
| FJ477418.1 | -----      | -----            | -----       | -----            | -----      | -----      |      |      |
| EF053406.1 | -----      | -----            | -----       | -----            | -----      | -----      |      |      |
|            | 1681       |                  |             |                  |            |            |      | 1740 |
| AY587563.1 | -----      | -----            | -----       | -----            | -----      | -----      |      |      |
| AY587562.1 | -----      | -----            | -----       | -----            | -----      | -----      |      |      |
| AY587565.1 | -----      | -----            | -----       | -----            | -----      | -----      |      |      |
| DQ422946.1 | TATGGTAGTT | TTGTAATTTT       | TAAGAAGCTA  | AAGCCTTTTT       | GTTATATTGT | AAATGGGTTT |      |      |
| DQ887488.1 | TATGGTAGTT | TTGTAATTTT       | TAAGAAGTTA  | AAGCCTTTTT       | GTTATATTGT | AAATGGGTTT |      |      |
| EF101912.1 | TATGGTAGTT | TTGTAATTTT       | TAAGAAGTTA  | AAGCCTTTTT       | GTTATATTGT | AAATGGGTTT |      |      |
| DQ897929.1 | -----      | -----            | -----       | -----            | -----      | -----      |      |      |
| FJ477418.1 | -----      | -----            | -----       | -----            | -----      | -----      |      |      |
| EF053406.1 | -----      | -----            | -----       | -----            | -----      | -----      |      |      |
|            | 1741       |                  |             |                  |            |            |      | 1800 |
| AY587563.1 | -----      | -----            | -----       | -----            | -----      | -----      |      |      |
| AY587562.1 | -----      | -----            | -----       | -----            | -----      | -----      |      |      |
| AY587565.1 | -----      | -----            | -----       | -----            | -----      | -----      |      |      |
| DQ422946.1 | TGGGTGTGTT | TATAAAGTTC       | ATTTTCATATA | GGGTATTTTT       | ATAATTTGGG | TCTTCATATT |      |      |
| DQ887488.1 | TGGGTGTGTT | TATAAAGTTC       | ATTTTCATATA | GGGTATTTTT       | ATAATTTGGG | TCTTCATATT |      |      |
| EF101912.1 | TGGGTGTGTT | TATAAAGTTC       | ATTTTCATATA | GGGTATTTTT       | ATAATTTGGG | TCTTCATATT |      |      |

```

DQ897929.1 -----
FJ477418.1 -----
EF053406.1 -----
1801                                SFBcj-R                                1860
AY587563.1 -----TGA TCCTCTGGAT TATTGTTATC GTATAATTGG
AY587562.1 -----TCCTTT---T CATTATTATA GTCCAATCGG
AY587565.1 -----TC CATGGGT TTTTGTTATC GTATAACCGG
DQ422946.1 GGGTATATTA GTAAATCTCC CTTTTATTTA TCCTCCGGAT TATTATTATT GTACAACAGG
DQ887488.1 GGGTATATTA GTAAATCTCC CTTTTATTTA TCCTCCGGAT TATTATTATT GTACAACAGG
EF101912.1 GGGTATATTA GTAAATCTCC CTTTTATTTA TCCTCCGGAT TATTATTATT GTACAACAGG
DQ897929.1 -----TCCTCCGGAT TATTATTATT GTACAACAGG
FJ477418.1 -----TCCTGAAGGT AATTGTCGTC ATATTCTCGG
EF053406.1 -----TCCTCCGGAT TATTATTATT GTACAACAGG
1861                                SFB-OUT-R                                1920
AY587563.1 GATTGGTATA GATAATGAAC TCTTAATGGA AACAGAAGAT TTCCTTAGGG GCGTAGGATA
AY587562.1 TTTTAGTATA GATAATGAAC TCTTAGTGGA ACGAAAGAT TTCGCTAGGG GCATAGGGGA
AY587565.1 GATTAGTATA GATAATGAAC TCTTAATGGG AAGAAGAGAT TTCTTAAAGG GCGTAGCAGA
DQ422946.1 GATTAGTATG GATAACAAAA TCTTAATGCT AAGAGTAGAT GACATTAGAG GCATAAGAAA
DQ887488.1 GATTAGTATG GATAACAAAA TCTTAATGCT AAGAGTAGAT GACATTAGAG GCATAAGAAA
EF101912.1 GATTAGTATG GATAACAAAA TCTTAATGCT AAGAGTAGAT GACATTAGAG GCATAAGAAA
DQ897929.1 GATTAGTATG GATAACAAAA TCTTAATGCT AAGAGTAGAT GACATTAGAG GCATAAGAAA
FJ477418.1 AATTAGTATA GATAATGAAC TCTTAATGAC AGAAAGAGGT TTCGATACCG GCATAGCAGA
EF053406.1 GATTAGTATG GATAACAAAA TCTTAATGCT AAGAGTAGAT GACATTAGAG GCATAAGAAA
1921                                SFB-OUT-R                                1980
AY587563.1 TCTGCATTTG TGTAATAATG AATCCAAGCA AGTTCTTGAA ACAGGAATTG AGTTGGCTGT
AY587562.1 TCTGCATCTG TGCAACGACA AATCCAAGCA AGTCCTTGAA ACAGGAATTG AGTTAGCAGC
AY587565.1 TCTCTATTTG TGTAAGTACG AATCCAAGCA GGTTCTTGAA ACAGGAATTA AGTTGGGCAT
DQ422946.1 TCTGGATTTA TGTGATTACG AATCCAACCA AGTTCTTGAA ACAGGAATTG AGTTGGCCAC
DQ887488.1 TCTGGATTTA TGTGATTACG AATCCAACCA AGTTCTTGAA ACAGGAATTG AGTTGGCCAC
EF101912.1 TCTGGATTTA TGTGATTACG AATCCAACCA AGTTCTTGAA ACAGGAATTG AGTTGGCCAC
DQ897929.1 TCTGGATTTA TGTGATTACG AATCCAACCA AGTTCTTGAA ACAGGAATTG AGTTGGCCAC
FJ477418.1 TCTGTATCTG CGTAATTATG AATCCAAGCA AGTTCTTGAA ACAGGAATTA AGTTGGCCGT
EF053406.1 TCTGGATTTA TGTGATTACG AATCCAACCA AGTTCTTGAA ACAGGAATTG AGTTGGCCAC
1981                                SFB-OUT-R                                2040
AY587563.1 CATGAAATAT GGCGAAATCG AATTCTCTTA CACAATTACT TACATAGAAA GCTTGGTTTT
AY587562.1 CATGAAATAT GGCGAAATCG AATTCTTGTT TGTAATTACT TACATAGAAA GTATGGTTTT
AY587565.1 CATGACATAT GGGGAAATCG AATTCTTGTT TTCATTACT TACATGGAGA GCTTGGTTTT
DQ422946.1 CATGAAATAT GGCGAAATCG AATTCTTGTT TTCAATTACT TACGTAGAAA GTTTGGTTTT
DQ887488.1 CATGAAATAT GGCGAAATCG AATTCTTGTT TTCAATTACT TACGTAGAAA CTTTACSCCTT
EF101912.1 CATGAAATAT GGCGAAATCG AATTCTTGTT TTCAATTACT TACGTAGAAA GTTTGGTTTT
DQ897929.1 CATGAAATAT GGCGAAATCG AATTCTTGTT TTCAATTACT TACGTAGAAA CTTTACCTTTT
FJ477418.1 CTTGAGATAT GGCGATATCG AATTCTTGTT TGCAATCACT TACATAGAAA GTTTGGTTTT
EF053406.1 CATGAAATAT GGCGAAATCG AATTCTTGTT TTCAATTACT TACGTAGAGA GTATGGTTTT
2041                                SFB-OUT-R                                2100
AY587563.1 TCTCGATAAA TATTAAATAG ATTTATAAAA TTTG--TCTC TTTTTTTTGG ----GATTT
AY587562.1 ACTCAATTAT TATTAAACAG AGGTATATAT AGTTAATTTT GTTTTCTGTC ----ATTTT
AY587565.1 ACTCAATTAA TTAGTAACAT ATATATAAAG T-----TTGG TTTTCTTCC ----GCTTT
DQ422946.1 ACTCAATAAT TATTAAACAG ATGTATAAAG TTTGTTGTTA TTTGTTTTTC TTTCGGTTTA
DQ887488.1 ACTCAATA
EF101912.1 ACTCAATA
DQ897929.1 ACTCAATT
FJ477418.1 ACTCAACAAT TGTTAA
EF053406.1 ACTCAATA

```

## ParMDO sequence alignment

|          |             |             |             |            |            |            |
|----------|-------------|-------------|-------------|------------|------------|------------|
| KY429941 | CGGATATCTA  | ATATGTCGCT  | AGACTCTGAA  | TCAAGATCGC | ATATTCAAAT | ATGATTTTAC |
| KY429940 | CGGATATCTA  | ATATGTCGCT  | AGACTCTGAA  | TCAAGATCGC | ATATTCAAAT | ATGATTTTAC |
| KY499716 |             |             |             |            |            |            |
|          | 61          |             |             |            |            | 120        |
| KY429941 | TTAATCAATG  | ATTCCGATTA  | CACTCTAATA  | ACACCACATA | CAAAATTGTT | TAACAAAAGG |
| KY429940 | TTAATCAATG  | ATTCCGATTA  | CACTCTAATA  | ACACCACATA | CAAAATTGTT | TAACAAAAGG |
| KY499716 |             |             |             |            |            |            |
|          | 121         |             |             |            |            | 180        |
| KY429941 | AAATTACTCA  | GCATTTAAAA  | AATATTTCCA  | AGGTCTGCAT | TCTTATTGGA | GCTGGGGAGT |
| KY429940 | AAATTACTCA  | GCATTTAAAA  | AATATTTCCA  | AGGTCTGCAT | TCTTATTGGA | GCTGGGGAGT |
| KY499716 |             |             |             |            |            |            |
|          | 181         |             |             |            |            | 240        |
| KY429941 | GAATGCTTTA  | AGATGTGAAG  | TTGTATCATT  | TTGTAGCTGC | TTCAAAAGCA | GCTAGGAAGA |
| KY429940 | GAATGCTTTA  | AGATGTGAAG  | TTGTATCATT  | TTGTAGCTGC | TTCAAAAGCA | GCTAGGAAGA |
| KY499716 |             |             | TCATT       | TTGTAGCTGC | TTCAAAAGCA | GCTAGGAAGA |
|          | 241         |             |             |            |            | 300        |
| KY429941 | CCTCAGTTGG  | TTGGGCACCA  | GCAAATTCTT  | CCTTTCCATT | AATCTGCCAA | AAGAACCAAA |
| KY429940 | CCTCAGTTGG  | TTGGGCACCA  | GCAAATTCTT  | CCTTTCCATT | AATCTGCCAA | AAGAACCAAA |
| KY499716 | CCTCAGTTGG  | TTGGGCACCA  | GCAAATTCTT  | CCTTTCCATT | AATCTGCCAA | AAGAACCAAA |
|          | 301         |             |             |            |            | 360        |
| KY429941 | TGATTAGTAG  | TGATGGATCT  | ATTTGGCTAA  | TCAAACAAAA | CCCAAATTTT | GAAAAGAAAA |
| KY429940 | TGATTAGTAG  | TGATGGATCT  | ATTTGGCTAA  | TCAAACAAAA | CCCAAATTTT | GAAAAGAAAA |
| KY499716 | TGATTAGTAG  | TGATGGATCT  | ATTTGGCTAA  | TCAAACAAAA | CCCAAATTTT | GAAAAGAAAA |
|          | 361         |             |             |            |            | 420        |
| KY429941 | AAAGAAGTGA  | GTTTTTCATCA | CCCACCACAA  | AATATGGGAT | TCCTTTTACT | TCTGAGTACT |
| KY429940 | AAAGAAGTGA  | GTTTTTCATCA | CCCACCACAA  | AATATGGGAT | TCCTTTTACT | TCTGAGTACT |
| KY499716 | AAAGAAGTGA  | GTTTTTCATCA | CCCACCACAA  | AATATGGGAT | TCCTTTTACT | TCTGAGTACT |
|          | 421         |             |             |            |            | 480        |
| KY429941 | TCTTAAGCTC  | TTCCTTGACC  | TTCATTGCAT  | CATAATGAGC | GAGGTCAGTT | CCACTCAAAA |
| KY429940 | TCTTAAGCTC  | TTCCTTGACC  | TTCATTGCAT  | CATAATGAGC | GAGGTCAGTT | CCACTCAAAA |
| KY499716 | TCTTAAGCTC  | TTCCTTGACC  | TTCATTGCAT  | CATAATGAGC | GAGGTCAGTT | CCACTCAAAA |
|          | 481         |             |             |            |            | 540        |
| KY429941 | ATATATAGAA  | GAAAGTTTGG  | GGTTTGTTTT  | ATTTCTGAGA | AAGGAATGAC | TGTTGCAGGA |
| KY429940 | ATATATAGAA  | GAAAGTTTGG  | GGTTTGTTTT  | ATTTCTGAGA | AAGGAATGAC | TGTTGCAGGA |
| KY499716 | ATATATAGAA  | GAAAGTTTGG  | GGTTTGTTTT  | ATTTCTGAGA | AAGGAATGAC | TGTTGCAGGA |
|          | 541         |             |             |            |            | 600        |
| KY429941 | TTCTAGTTTT  | AATTTGGCCT  | GTTTTGGAAC  | CAAAGGATCA | TAACAAAAAT | TCCACAATCC |
| KY429940 | TTCTAGTTTT  | AATTTGGCCT  | GTTTTGGAAC  | CAAAGGATCA | TAACAAAAAT | TCCACAATCC |
| KY499716 | TTCTAGTTTT  | AATTTGGCCT  | GTTTTGGAAC  | CAAAGGATCA | TAACAAAAAT | TCCACAATCC |
|          | 601         |             |             |            |            | 660        |
| KY429941 | TCTATCTGGT  | TTTTGCTGTC  | CTTCAACATA  | GCTTGGCCTG | GAAAATAATA | GGAACATGAA |
| KY429940 | TCTATCTGGT  | TTTTGCTGTC  | CTTCAACATA  | GCTTGGCCTG | GAAAATAATA | GGAACATGAA |
| KY499716 | TCTATCTGGT  | TTTTGCTGTC  | CTTCAACATA  | GCTTGGCCTG | GAAAATAATA | GGAACATGAA |
|          | 661         |             |             |            |            | 720        |
| KY429941 | GGAATTGGTG  | AAGAACAGAC  | CTCAGTGAGC  | CCATTGTTGG | GGTCATCAAG | AAACTCTGCT |
| KY429940 | GGAATTGGTG  | AAGAACAGAC  | CTCAGTGAGC  | CCATTGTTGG | GGTCATCAAG | AAACTCTGCT |
| KY499716 | GGAATTGGTG  | AAGAACAGAC  | CTCAGTGAGC  | CCATTGTTGG | GGTCATCAAG | AAACTCTGCT |
|          | 721         |             |             |            |            | 780        |
| KY429941 | GCCCCTTCTA  | TTTCAATCTT  | TTCAGCACAT  | TTCAGAAGAT | AATCCCTGCA | CCCAAATTGC |
| KY429940 | GCCCCTTCTA  | TTTCAATCTT  | TTCAGCACAT  | TTCAGAAGAT | AATCCCTGCA | CCCAAATTGC |
| KY499716 | GCCCCTTCTA  | TTTCAATCTT  | TTCAGCACAT  | TTCAGAAGAT | AATCCCTGCA | CCCAAATTGC |
|          | 781         |             |             |            |            | 840        |
| KY429941 | AAATGTTTTGT | GCCTCTTTTA  | AGTTTTTAAAT | TAGATTAAGG | ATGTAAAAGT | ACTTAACCCA |
| KY429940 | AAATGTTTTGT | GCCTCTTTTA  | AGTTTTTAAAT | TAGATTAAGG | ATGTAAAAGT | ACTTAACCCA |
| KY499716 | AAATGTTTTGT | GCCTCTTTTA  | AGTTTTTAAAT | TAGATTAAGG | ATGTAAAAGT | ACTTAACCCA |
|          | 841         |             |             |            |            | 900        |
| KY429941 | GAACATATCT  | TTGCATCCAT  | AGCCATTGCT  | TGAAAATTAA | GAATAGATTA | ATCAATCCTC |

|          |            |            |            |            |             |             |      |
|----------|------------|------------|------------|------------|-------------|-------------|------|
| KY429940 | GAACATATCT | TTGCATCCAT | AGCCATTGCT | TGAAAATTAA | GAATAGATTA  | ATCAATCCTC  |      |
| KY499716 | GAACATATCT | TTGCATCCAT | AGCCATTGCT | TGAAAATTAA | GAATAGATTA  | ATCAATCCTC  |      |
|          | 901        |            |            |            |             |             | 960  |
| KY429941 | CCCATGTTAC | AAAACATAAC | AAGAGAATAA | ATCACCATAT | GCAATCTTAC  | CTGTCCCCAA  |      |
| KY429940 | CCCATGTTAC | AAAACATAAC | AAGAGAATAA | ATCACCATAT | GCAATCTTAC  | CTGTCCCCAA  |      |
| KY499716 | CCCATGTTAC | AAAACATAAC | AAGAGAATAA | ATCACCATAT | GCAATCTTAC  | CTGTCCCCAA  |      |
|          | 961        |            |            |            |             |             | 1020 |
| KY429941 | TGAATCTCCC | ATCTGTGAAA | TATCCAAGAC | AGATCTCATC | CACTAGATCA  | TGCTGCTTAT  |      |
| KY429940 | TGAATCTCCC | ATCTGTGAAA | TATCCAAGAC | AGATCTCATC | CACTAGATCA  | TGCTGCTTAT  |      |
| KY499716 | TGAATCTCCC | ATCTGTGAAA | TATCCAAGAC | AGATCTCATC | CACTAGATCA  | TGCTGCTTAT  |      |
|          | 1021       |            |            |            |             |             | 1080 |
| KY429941 | CATGATCCTG | TAGCCCAGCA | AAATATATAT | GGGAGATTCA | CTAATATACC  | CAATATATGA  |      |
| KY429940 | CATGATCCTG | TAGCCCAGCA | AAATATATA- | -----      | -----       | -----       |      |
| KY499716 | CATGATCCTG | TAGCCCAGCA | AAATATATA- | -----      | -----       | -----       |      |
|          | 1081       |            |            |            |             |             | 1140 |
| KY429941 | GCCCAAATTA | TAAAAAACC  | CTATATGAAA | TGGAATTTAT | AAATACACCC  | AAAGCCCATT  |      |
| KY429940 | -----      | -----      | -----      | -----      | -----       | -----       |      |
| KY499716 | -----      | -----      | -----      | -----      | -----       | -----       |      |
|          | 1141       |            |            |            |             |             | 1200 |
| KY429941 | TATAACATAA | CAAAAAAGCT | TTTAACTTCT | TTTAAATTAC | AAAATTGCCA  | TTGATTTCTT  |      |
| KY429940 | -----      | -----      | -----      | -----      | -----       | -----       |      |
| KY499716 | -----      | -----      | -----      | -----      | -----       | -----       |      |
|          | 1201       |            |            |            |             |             | 1260 |
| KY429941 | AAAACAAACC | CAACCCAAAA | TTTCATAAAA | AAACCCAAAA | CACTCAATAG  | GGTATCAAAG  |      |
| KY429940 | -----      | -----      | -----      | -----      | -----       | -----       |      |
| KY499716 | -----      | -----      | -----      | -----      | -----       | -----       |      |
|          | 1261       |            |            |            |             |             | 1320 |
| KY429941 | TAATTTAATA | ATTAAAATTA | AATTTAATAG | TACAATTTGT | CATTTTTTTGG | GTTTTTTTTTG |      |
| KY429940 | -----      | -----      | -----      | -----      | -----       | -----       |      |
| KY499716 | -----      | -----      | -----      | -----      | -----       | -----       |      |
|          | 1321       |            |            |            |             |             | 1380 |
| KY429941 | GGTATGTTTA | TAAAAATGAA | ATGATGTAGG | GTTTATTTAT | AGTTTTAGTG  | CTAAGAATGG  |      |
| KY429940 | -----      | -----      | -----      | -----      | -----       | -----       |      |
| KY499716 | -----      | -----      | -----      | -----      | -----       | -----       |      |
|          | 1381       |            |            |            |             |             | 1440 |
| KY429941 | GTATATTACT | AAATATCTCA | ATATATAAGC | CTGTGACTCT | TAATAGTATT  | TCCCCTGCAC  |      |
| KY429940 | -----      | -----      | -----AGC   | CTGTGACTCT | TAATAGTATT  | TCCCCTGCAC  |      |
| KY499716 | -----      | -----      | -----AGC   | CTGTGACTCT | CAATAGTATT  | TCCCCTGCAC  |      |
|          | 1441       |            |            |            |             |             | 1500 |
| KY429941 | ATGTTTTACA | CAATATTTGT | TAACACATTA | GACCACCACC | GAAAAAATCC  | TTGTTTCCAT  |      |
| KY429940 | ATGTTTTACA | CAATATTTGT | TAACACATTA | GACCACCACC | GAAAAAATCC  | TTGTTTCCAT  |      |
| KY499716 | ATGTTTTACA | CAATATTTGT | TAACACATTA | GACCACCACC | GAAAAAATCC  | TTGTTTCCAT  |      |
|          | 1501       |            |            |            |             |             | 1560 |
| KY429941 | GCTTTCCCTC | TATGTGAAAT | TGTTTGTTTA | CACACGCAA  | CACACAATCA  | GCCTGAAAAA  |      |
| KY429940 | GCTTTCCCTC | TATGTGAAAT | TGTTTGTTTA | CACACGCAA  | CACACAATCA  | GCCTGAAAAA  |      |
| KY499716 | GCTTTCCCTC | TATGTGAAAT | TGTTTGTTTA | CACACGCAA  | CACACAATCA  | GCCTGAAAAA  |      |
|          | 1561       |            |            |            |             |             | 1620 |
| KY429941 | TGAAAGAAAG | AAAAATCAAT | GTCTGCACTT | ACGTGAGTCC | CTCGATCTTA  | TAGGTCATGT  |      |
| KY429940 | TGAAAGAAAG | AAAAATCAAT | GTCTGCACTT | ACGTGAGTCC | CTCGATCTTA  | TAGGTCATGT  |      |
| KY499716 | TGAAAGAAAG | AAAAATCAAT | GTCTGCACTT | ACGTGAGTCC | CTCGATCTTA  | TAGGTCATGT  |      |
|          | 1621       |            |            |            |             |             | 1680 |
| KY429941 | CATGGTTTGA | AAAGATCTGC | AAATTGTGAA | AAGGAAACAT | AAGAATGAAT  | ACCACTTAAA  |      |
| KY429940 | CATGGTTTGA | AAAGATCTGC | AAATTGTGAA | AAGGAAACAT | AAGAATGAAT  | ACCACTTAAA  |      |
| KY499716 | CATGGTTTGA | AAAGATCTGC | AAATTGTGAA | AAGGAAACAT | AAGAATGAAT  | ACCACTTAAA  |      |
|          | 1681       |            |            |            |             |             | 1740 |
| KY429941 | ACGAGCAACC | AAATCAAGGA | GAAAAACTTC | CCCATCCCCG | TTTCACTGCC  | CCATCTCTCT  |      |
| KY429940 | ACGAGCAACC | AAATCAAGGA | GAAAAACTTC | CCCATCCCCG | TTTCACTGCC  | CCATCTCTCT  |      |

|          |            |            |             |            |             |            |      |      |
|----------|------------|------------|-------------|------------|-------------|------------|------|------|
| KY499716 | ACGAGCAACC | AAATCAAGGA | GAAAAACTTC  | CCCATCCCCG | TTTCACTGCC  | CCATCTCTCT | 1741 | 1800 |
| KY429941 | ATTTCTCTCC | TCCTGTCACC | TATCAGATGA  | GGAGATAGAT | AGAAAGAGGG  | GGACGATGAA |      |      |
| KY429940 | ATTTCTCTCC | TCCTGTCACC | TATCAGATGA  | GGAGATAGAT | AGAAAGAGGG  | GGACGATGAA |      |      |
| KY499716 | ATTTCTCTCC | TCCTGTCACC | TATCAGATGA  | GGAGATAGAT | AGAAAGAGGG  | GGACGATGAA | 1801 | 1860 |
| KY429941 | ACAGGGATGG | GGAAGTGTTT | TATGTATATA  | TTACATACAT | CCGCCATACG  | GGTCTGAAAC |      |      |
| KY429940 | ACAGGGATGG | GGAAGTGTTT | TATGTATATA  | TTACATACAT | CCGCCATACG  | GGTCTGAAAC |      |      |
| KY499716 | ACAGGGATGG | GGAAGTGTTT | TATGTATATA  | TTACATACAT | CCGCCATACG  | GGTCTGAAAC | 1861 | 1920 |
| KY429941 | ACTTCAGCTA | CATCAGCGCC | CATCTTTGTA  | TCATAAACT  | CTTTCTTGTA  | AATGCCTTCT |      |      |
| KY429940 | ACTTCAGCTA | CATCAGCGCC | CATCTTTGTA  | TCATAAACT  | CTTTCTTGTA  | AATGCCTTCT |      |      |
| KY499716 | ACTTCAGCTA | CATCAGCGCC | CATCTTTGTA  | TCATAAACT  | CTTTCTTGTA  | AATGCCTTCT | 1921 | 1980 |
| KY429941 | TTAGGGACTT | CAGGATCAAT | TTGAAATGGA  | TGCCATCTGA | GCTCAAACCTC | GTATCGATCA |      |      |
| KY429940 | TTAGGGACTT | CAGGATCAAT | TTGAAATGGA  | TGCCATCTGA | GCTCAAACCTC | GTATCGATCA |      |      |
| KY499716 | TTAGGGACTT | CAGGATCAAT | TTGAAATGGA  | TGCCATCTGA | GCTCAAACCTC | GTATCGATCA | 1981 | 2040 |
| KY429941 | TTACCTTCCA | CTAGAGCTTT | GTCAAGGTTT  | CTTTTGCCCA | CAAAGCACCA  | TGGACACACA |      |      |
| KY429940 | TTACCTTCCA | CTAGAGCTTT | GTCAAGGTTT  | CTTTTGCCCA | CAAAGCACCA  | TGGACACACA |      |      |
| KY499716 | TTACCTTCCA | CTAGAGCTTT | GTCAAGGTTT  | CTTTTGCCCA | CAAAGCACCA  | TGGACACACA | 2041 | 2100 |
| KY429941 | GTGTCTGCAA | TTATATCAAT | TTCCACAAGC  | TTTTTCTTGA | TTCCAGCCAT  | ATCTGCAACT |      |      |
| KY429940 | GTGTCTGCAA | TTATATCAAT | TTCCACAAGC  | TTTTTCTTGA | TTCCAGCCAT  | ATCTGCAACT |      |      |
| KY499716 | GTGTCTGCAA | TTATATCAAT | TTCCACAAGC  | TTTTTCTTGA | TTCCAGCCAT  |            | 2101 | 2160 |
| KY429941 | GTATCCCGAC | AATATTTAAC | ACTCAAACCTA | GATGGTGAAA | TTGGCACTCA  | AACAATTGCT |      |      |
| KY429940 | GTATCCCGAC | AATATTTAAC | ACTCAAACCTA | GATGGTGAAA | TTGGCACTCA  | AACAATTGCT |      |      |
| KY499716 |            |            |             |            |             |            | 2161 | 2220 |
| KY429941 | GCCAATATGG | CAACCATGAC | ATATATTAGA  | GCCACCAAAT | TCATCAAATC  | ATATATACAT |      |      |
| KY429940 | GCCAATATGG | CAACCATGAC | ATATATTAGA  | GCCACCAAAT | TCATCAAATC  | ATATATACAT |      |      |
| KY499716 |            |            |             |            |             |            | 2221 | 2259 |
| KY429941 | TTATATCTAT | ATTAAGTGTT | TTAATGTCAA  | CCCAACCGT  |             |            |      |      |
| KY429940 | TTATATCTAT | ATTAAGTGTT | TTAATGTCAA  | CCCAACCGT  |             |            |      |      |
| KY499716 |            |            |             |            |             |            |      |      |

### Primer design ParMDO

CATCTAGTTTGTAGTGTTAAATATTGTCGGGATACAGTTGCAGATATGGCTGGAATCAAGAAAAAGCTTGT  
 GGAAATTGATATAATTGCAGACACTGTGTGTCCATGGTGCTTTGTGGGCAAAAGAAACCTTGACAAAGCT  
 CTAGTGGAAGGTAATGATCGATACGAGTTTGTAGCTCAGATGGCATCCATTTCAAATTGATCCTGAAGTCC  
 CTAAAGAAGGCATTTACAAGAAAGAGTTTTATGATACAAAGATGGGCGCTGATGTAGCTGAAGTGTTTCA  
 GACCCGTATGGCGGATGTATGTAATATATACATAAAACACTTCCCTATCCTGTTTTATCGTCCCCCTCTT  
 TCTATCTCCTCATCTGATAGGTGACAGGAGGAGAAAAATAGAGAGATGGGGAAGTTTTTCTCCTTGATTT  
 GGTTGCTCGTTTTAAGTGGTATTCATTCTTATGTTTCCTTTTCACAATTTGCAGATCTTTTCAAACCATG  
 ACATGACCTATAAGATCGAGGGACTCACGTAAGTGCAGACATTGATTTTTCTTTCTTTTCAATTTTCAGGC  
 TGATTGTGTGTTTGCCTGTGTAAACAAACAATTTACATAGAGGGAAAGCATGGAAACAAGGATTTTTTC  
 GGTGGTGGTCTAATGTGTTAAACAAATATTGTGTAAACATGTGCAGGGGAAATACTATTGAGAGTCACAG  
 GCTTATATATTGAGATATTTAGTAATATAACCATTCCTTAGCACTAAACTATAAATAAACCCCTACATCAT  
 TTCATTTTTATAAACATAACCCAAAAAAACCCAAAAAATGACAAATTGTACTATTAAATTTAATTTAAT  
 TATTAAATTACTTTGATACCTATTGAGTGTTTTGGGTTTTTTTATGAAATTTGGGTTGGGTTTGT  
 AAGAAATCAATGGCAATTTTGTAAATTTAAAGAAGTTAAAGCTTTTTGTATGTTATAAATGGGCTTT  
 GGGTGTATTTATAAATTCATTTTCATATAGGGTTTTTTTATAAATTTGGGCTCATATATTGGGTATATTAG  
 TGAATCTCCCATATATATTGCTGGGCTACAGGATCATGATAAGCAGCATGATCTAGTGGAATGAGATCT



GTCTTGGATATTTACAGATGGGAGATTCATTGGGGACAGGTAAGATTGCATATGGTGATTTATTCTCTT  
GTTTAGTTTTGTAAACATGGGGAGGATTGATTAATCTATTCTTAAAATTCAAGCAATGGCTATGGATGCAA  
AGATATGTTCTGGGTAAAGTACTTTTACATCCTTAATCTAATTTAAAACCTAAAAGAGGCACAAACATTT  
GCAATTTGGGTGCAGGGATTATCTTCTGAAATGTGCTGAAAAGATTGAAATAGAAGGGGCAGCAGAGTTT  
CTTGATGACCCCAACAATGGGCTCACTGAGGTCTGTTCTTCACCAATTCCTTCATGTTCTATTATTTTC  
CAGGCCAAGCTATGTTGAAGGACAGCAAAAACCAGATAGAGGATTGTGGAATTTTTGTTATGATCCTTTG  
GTTCCAAAACAGGCCAAAATTAAAACCTAGAATCCTGCAACAGTCATTCCTTTCTCAGAAATAAACCAAACC  
CCAAACTTTCTTCTATATATTTTTGAATGGAAGTACCTCGCTCATTATGATGCAATGAAGGTCAAGGAA  
GAGCTTAAGAAGTACTCAGAAGTAAAAGGAATCCCATATTTTGTGGTGGGTGATGAAAACCTCA
